# Supplementary material
Source: HighWire-hosted journal article supplement (https://jnm.snmjournals.org/highwire/filestream/94730/field_highwire_adjunct_files/0/151621_Supplemental_Data.pdf)
Supplement: 151621_Supplemental_Data.pdf [file 151621_Supplemental_Data.pdf]

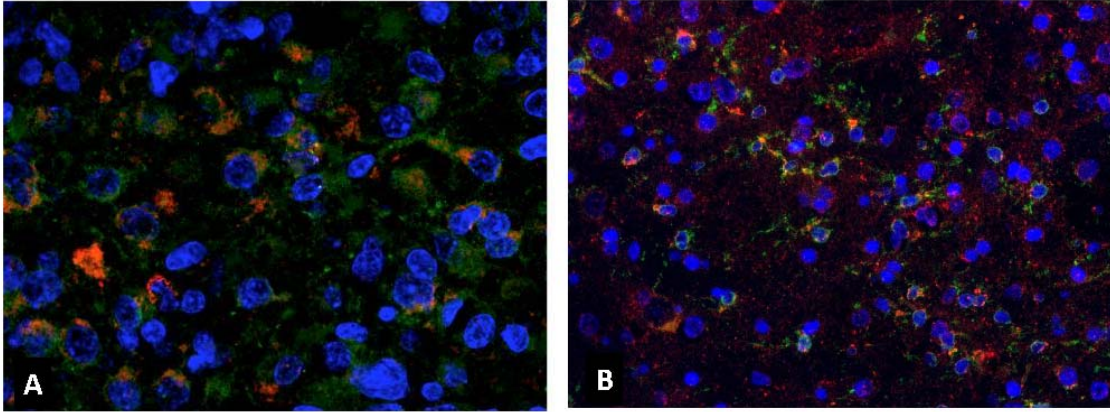

Supplemental Figure 1.

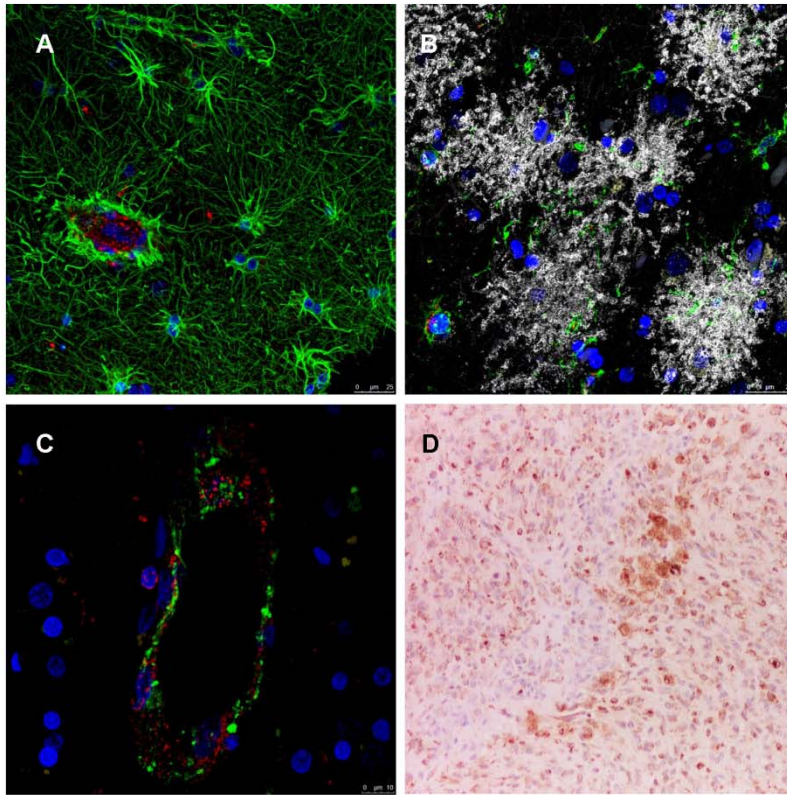

Supplemental Figure 2.

**SUPPLEMENTAL TABLE 1** Demographic and clinical details of patients with gliomas

| <b>ID</b> | <b>Age</b> | <b>Sex</b> | <b>Diagnosis (WHO grade)</b> | <b>Contrast enhancement</b> | <b>Tumor location (side)</b>         | <b>Main symptom</b>                | <b>Surgical operation</b> |
|-----------|------------|------------|------------------------------|-----------------------------|--------------------------------------|------------------------------------|---------------------------|
| 1         | 41         | M          | LGO (II)                     | No                          | Frontal-temporal lobe (R)            | Seizures                           | Burr hole biopsy *        |
| 2         | 25         | F          | LGA (II)                     | No                          | Frontal lobe (R)                     | Headache                           | Open biopsy + Debulking * |
| 3         | 37         | M          | AA (III)                     | No                          | Frontal-temporal lobe (R)            | Seizures                           | Open biopsy + Debulking * |
| 4         | 45         | M          | LGO (II)                     | No                          | Medial temporal lobe (R)             | Seizures, headache                 | Burr hole biopsy *        |
| 5         | 24         | F          | LGO (II)                     | No                          | Parietal lobe (R)                    | Headache, seizures                 | Open biopsy * + Debulking |
| 6         | 40         | M          | LGO (II)                     | No                          | Frontal lobe (R)                     | Seizures                           | Open biopsy * + Debulking |
| 7         | 63         | F          | LGA (II)                     | No                          | Parietal, frontal, temporal lobe (L) | Seizures                           | Burr hole biopsy *        |
| 8         | 33         | M          | LGA (II)                     | No                          | Posterior frontal lobe (R)           | Seizures                           | Open biopsy + Debulking * |
| 9         | 42         | M          | AA (III)                     | Focal                       | Posterior frontal lobe (L)           | Seizures, headache                 | Open biopsy + Debulking * |
| 10        | 30         | M          | LGO (II)                     | No                          | Posterior frontal lobe (R)           | Headache                           | Open biopsy * + Debulking |
| 11        | 47         | F          | LGA (II)                     | No                          | Temporal lobe (L)                    | Seizures, headache                 | Burr hole biopsy *        |
| 12        | 46         | M          | AA (III)                     | Focal                       | Parietal lobe (L)                    | Seizures, headache                 | Open biopsy * + Debulking |
| 13        | 57         | M          | GBM (IV)                     | Focal / Minor               | Posterior frontal lobe (L)           | Seizures, headache                 | Open biopsy * + Debulking |
| 14        | 22         | M          | AO (III)                     | Minor                       | Frontal-parietal lobe (R)            | Loss of dexterity in the left hand | Open biopsy + Debulking * |
| 15        | 41         | M          | GBM (IV)                     | Massive                     | Temporal-occipital lobe (R)          | Headache                           | Open biopsy + Debulking * |
| 16        | 33         | M          | LGA (II)                     | No                          | Frontal lobe (L)                     | Seizures                           | Open biopsy + Debulking * |
| 17        | 42         | M          | LGA (II)                     | No                          | Temporal lobe (L)                    | Seizures                           | Burr hole biopsy *        |
| 18        | 52         | M          | AA (III)                     | Minor                       | Parietal lobe (L)                    | Seizures                           | Burr hole biopsy *        |
| 19        | 24         | M          | LGO (II)                     | No                          | Frontal-temporal lobe (R)            | Seizures                           | Open biopsy + Debulking * |
| 20        | 40         | F          | GBM (IV)                     | Massive                     | Frontal lobe (R)                     | Seizures, headache                 | Open biopsy + Debulking * |

|    |    |   |          |       |                           |                    |                           |
|----|----|---|----------|-------|---------------------------|--------------------|---------------------------|
| 21 | 50 | F | LGO (II) | No    | Frontal lobe (L)          | Headache, vertigo  | Open biopsy * + Debulking |
| 22 | 24 | M | AO (III) | Minor | Frontal-temporal lobe (L) | Seizures, headache | Open biopsy + Debulking * |

LGA = low-grade astrocytoma, AA = anaplastic astrocytoma, GBM = glioblastoma; LGO = low-grade oligodendroglioma, AO = anaplastic oligodendroglioma; \* where tumor tissue was obtained for neuropathological assessments; the tissue obtained from patient 4 was not enough for ICH and DIF assessments. Patients 15 and 19 were on dexamethasone throughout the study.

**SUPPLEMENTAL TABLE 2** Quantitative immunohistochemistry results in different histotypes and grades of gliomas

|                   | <b>TSPO(+)<br/>neoplastic cells<br/>(per 0.25mm<sup>2</sup>)</b> | <b>TSPO<br/>surface/intensity<br/>(%)</b> | <b>Iba1(+)<br/>GAMs<br/>density<br/>(per 0.25mm<sup>2</sup>)</b> | <b>TSPO(+)<br/>GAMs<br/>density<br/>(per 0.25mm<sup>2</sup>)</b> | <b>TSPO(+)<br/>GAMs<br/>vs. all TSPO<br/>population (%)</b> |
|-------------------|------------------------------------------------------------------|-------------------------------------------|------------------------------------------------------------------|------------------------------------------------------------------|-------------------------------------------------------------|
| <b>LGG (n=12)</b> | <b>34.4±21.0</b>                                                 | <b>1.37±0.32</b>                          | <b>52.3±18.6</b>                                                 | <b>9.0±9.3</b>                                                   | <b>20.2±13.2</b>                                            |
| LGA (n=6)         | 45.6±23.8                                                        | 1.50±0.32*                                | 55.7±16.0                                                        | 6.5±5.9                                                          | 13.8±10.4                                                   |
| LGO (n=6)         | 23.6±10.4                                                        | 1.23±0.28†                                | 56.8±22.5                                                        | 11.5±11.8                                                        | 26.7±13.2                                                   |
| <b>HGG (n=9)</b>  | <b>52.8±31.0</b>                                                 | <b>3.27±1.55</b>                          | <b>85.9±57.2</b>                                                 | <b>15.9±14.0</b>                                                 | <b>23.6±14.5</b>                                            |
| AA (n=4)          | 32.5±26.7                                                        | 2.77±1.60                                 | 64.8±15.2                                                        | 11.3±5.7                                                         | 30.3±17.3                                                   |
| GBM (n=3)         | 77.3±10.3                                                        | 4.34±1.52                                 | 146.0±64.2                                                       | 23.8±21.9                                                        | 20.3±12.9                                                   |
| AO (n=2)          | 56.6±43.1                                                        | 2.68±1.32                                 | 38.0±7.1                                                         | 13.3±15.2                                                        | 15.2±9.1                                                    |

\*  $P=0.025$  compared with HGG; †  $P=0.007$  compared with HGG.

LGG = low-grade glioma; LGA = low-grade astrocytoma, LGO = low-grade oligodendroglioma, HGG = high-grade glioma; AA = anaplastic astrocytoma, GBM = glioblastoma; AO = anaplastic oligodendroglioma; TSPO = translocator protein; GAMs = glioma associated microglia/macrophages; Iba1 = calcium-binding adapter molecule 1.
